# Supplementary material for: Photosensitizer (PS)/polyhedral oligomeric silsesquioxane (POSS)-crosslinked nanohybrids for enhanced imaging-guided photodynamic cancer therapy
Source: Royal Society of Chemistry journal article supplement (doi:10.1039/c7nr02279d), 2017-01-01
Supplement: c7nr02279d1.pdf [file c7nr02279d1.pdf]

## Supplementary Information

### **Photosensitizer (PS)/polyhedral oligomeric silsesquioxane (POSS)-crosslinked nanohybrids for enhanced imaging-guided photodynamic cancer therapy**

Ya-Xuan Zhu,<sup>a‡</sup> Hao-Ran Jia,<sup>a‡</sup> Zhan Chen,<sup>b</sup> and Fu-Gen Wu<sup>\*a</sup>

*<sup>a</sup>State Key Laboratory of Bioelectronics, School of Biological Science and Medical Engineering,  
Southeast University, Nanjing 210096, P. R. China. E-mail: wufg@seu.edu.cn*

*<sup>b</sup>Department of Chemistry, University of Michigan, 930 North University Avenue, Ann Arbor,  
Michigan 48109, United States*

<sup>‡</sup>These authors contributed equally to this work.

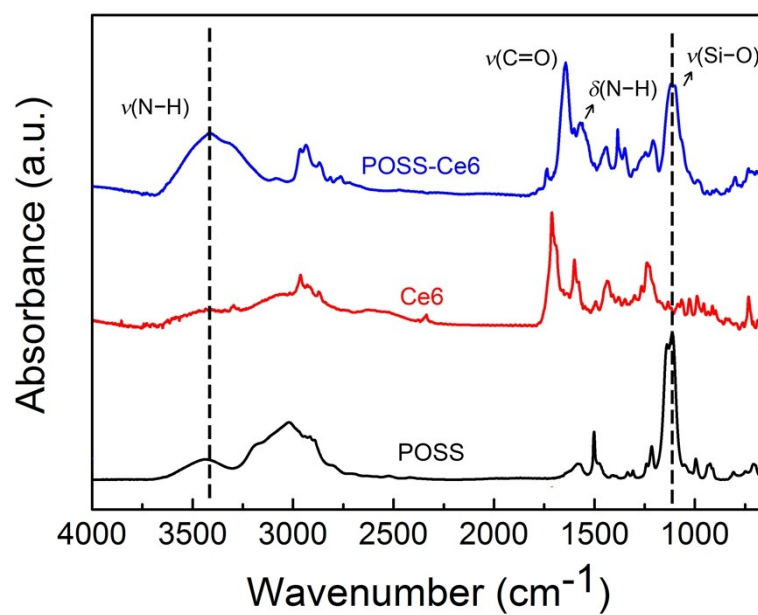

**Fig. S1** The FTIR spectra of POSS-Ce6, Ce6 and POSS.

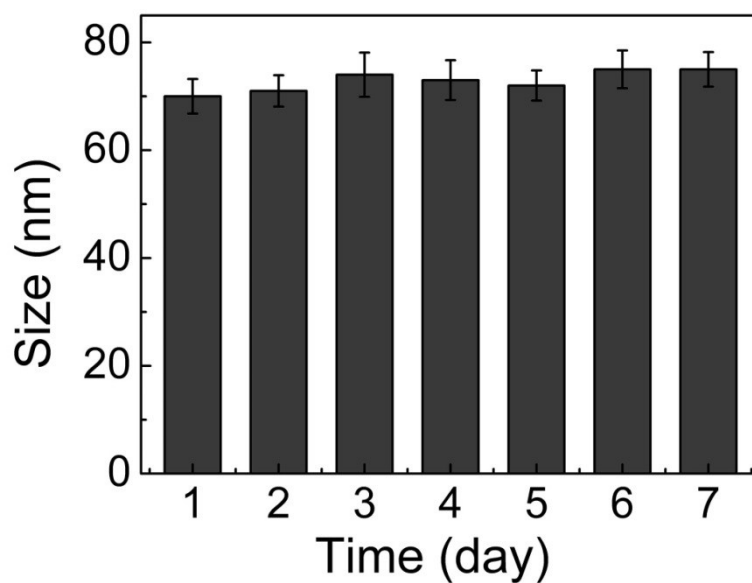

**Fig. S2** The size change of POSS-Ce6-PEG NPs in culture medium within a week.

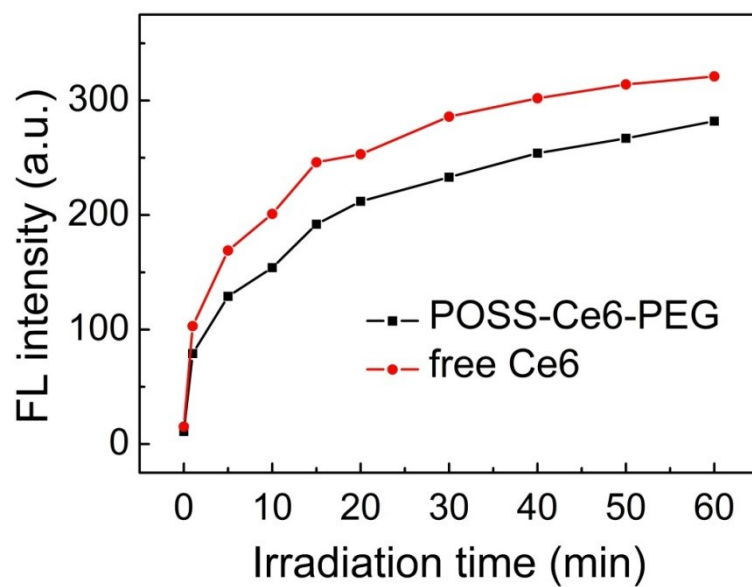

**Fig. S3**  $^1\text{O}_2$  generation of free Ce6 and POSS-Ce6-PEG by measuring the fluorescence intensities of SOSG under various laser irradiation (670 nm, 8 mW/cm<sup>2</sup>) time periods.
